# Supplementary material
Source: PubMed Central journal article supplement (PMC3261315)

Figure S2

A ASP western blot in testes

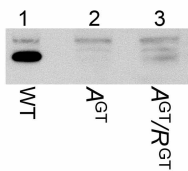

B ASP IHC in trachea

WT

$A^{Gt}$

$A^{Gt}/R^{Gt}$

40X

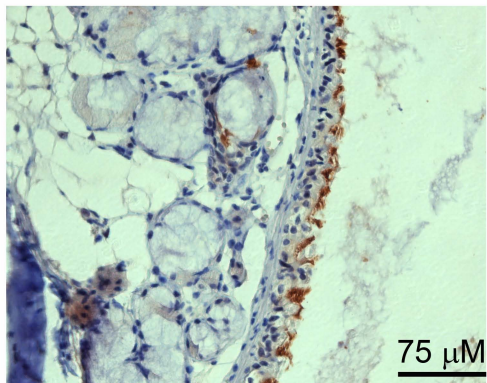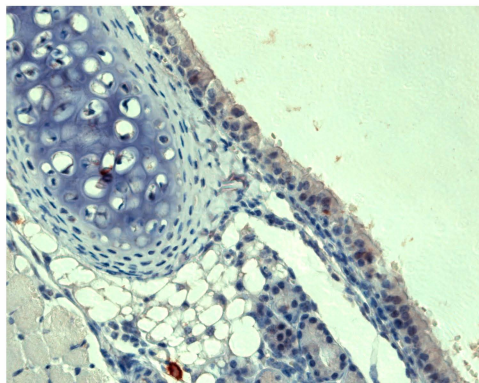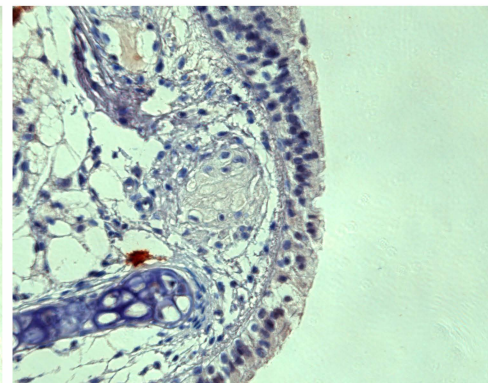

100X

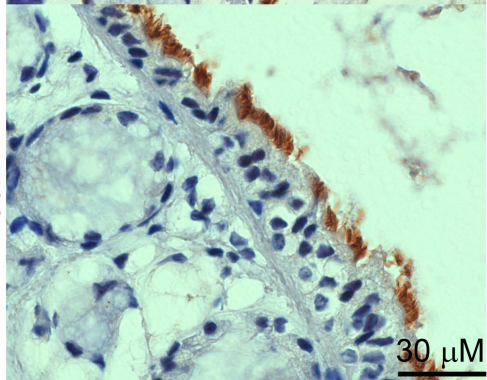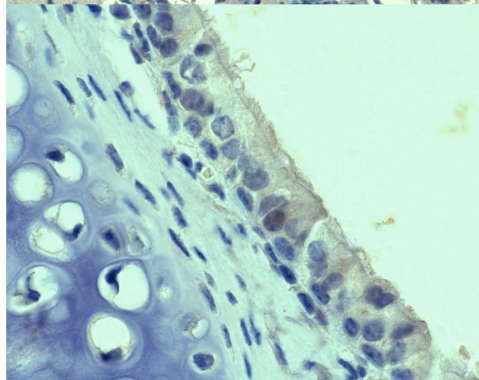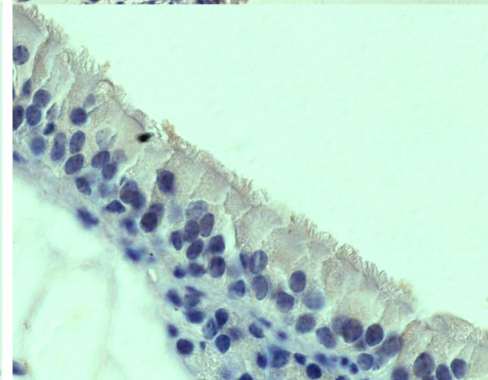

Supplement: NIHMS336177-supplement-Supp_Figure_S2.pdf [file NIHMS336177-supplement-Supp_Figure_S2.pdf]
